# Supplementary material for: Orf132: A Critical Gene for LSDV Replication and Its Role in ER Stress-Related Apoptosis
Source: Research Square preprint supplement (doi:10.21203/rs.3.rs-6261646/v1), 2025-03-24

**Supplemental Figure 1.** Volcano plot of differentially expressed genes between the LSDV infection group and the  $\Delta Orf132$  infection group

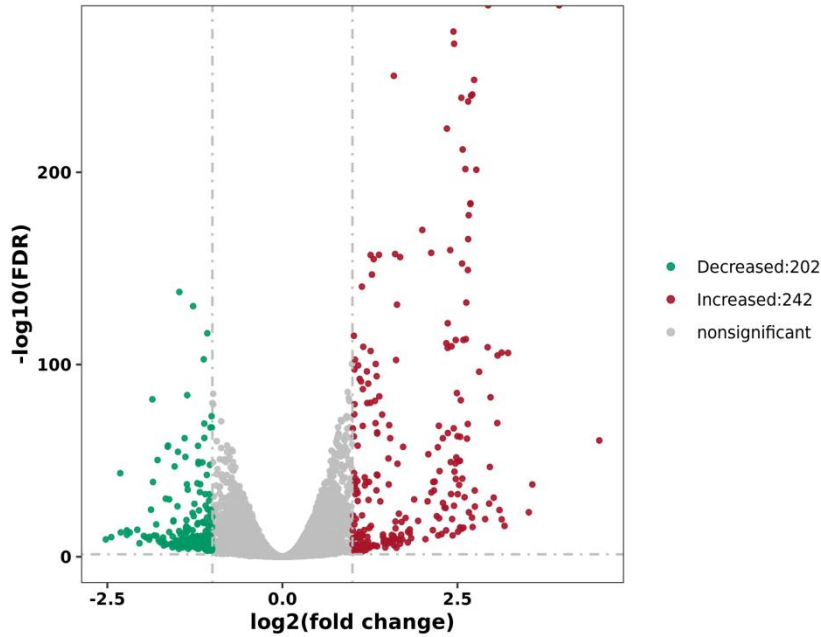

**Supplemental Figure 2.** GO enrichment analysis of differential genes between the LSDV infection group and the LSDV- $\Delta Orf132$  infection group

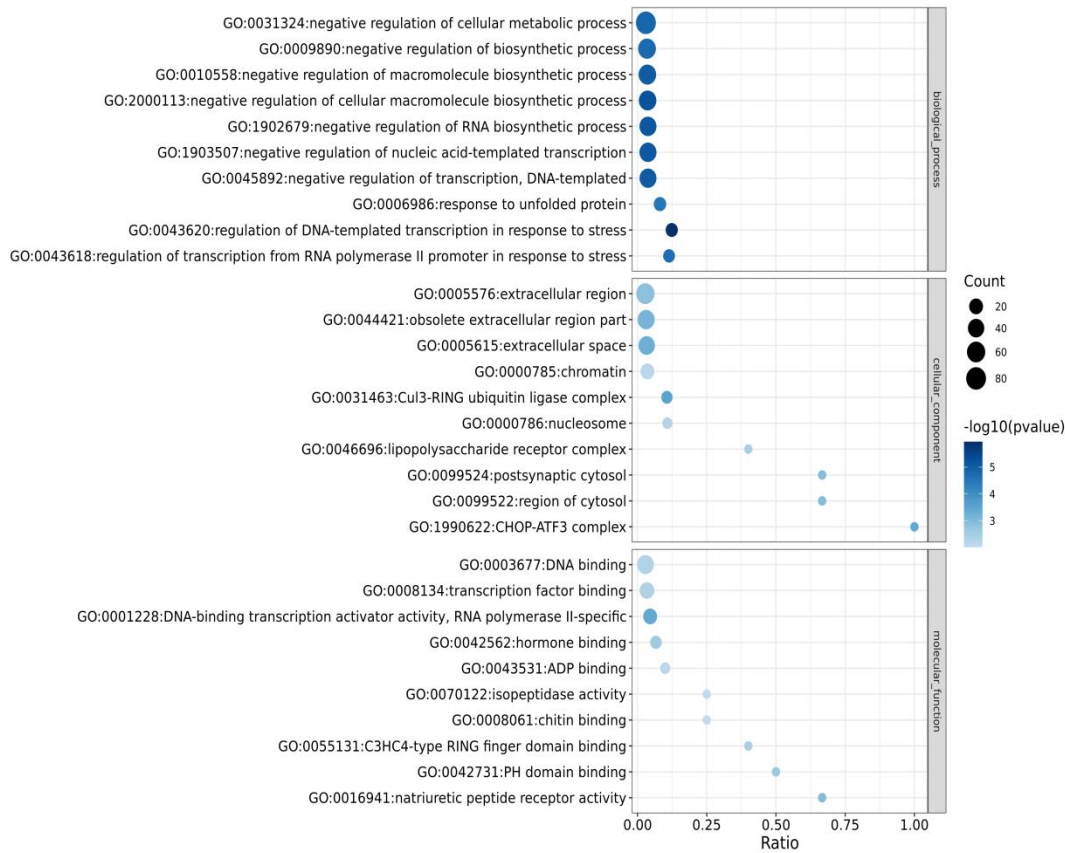

**Supplemental Figure 3.** KEGG enrichment analysis of differential genes between the LSDV infection group and the LSDV- $\Delta$ *Orf132* infection group

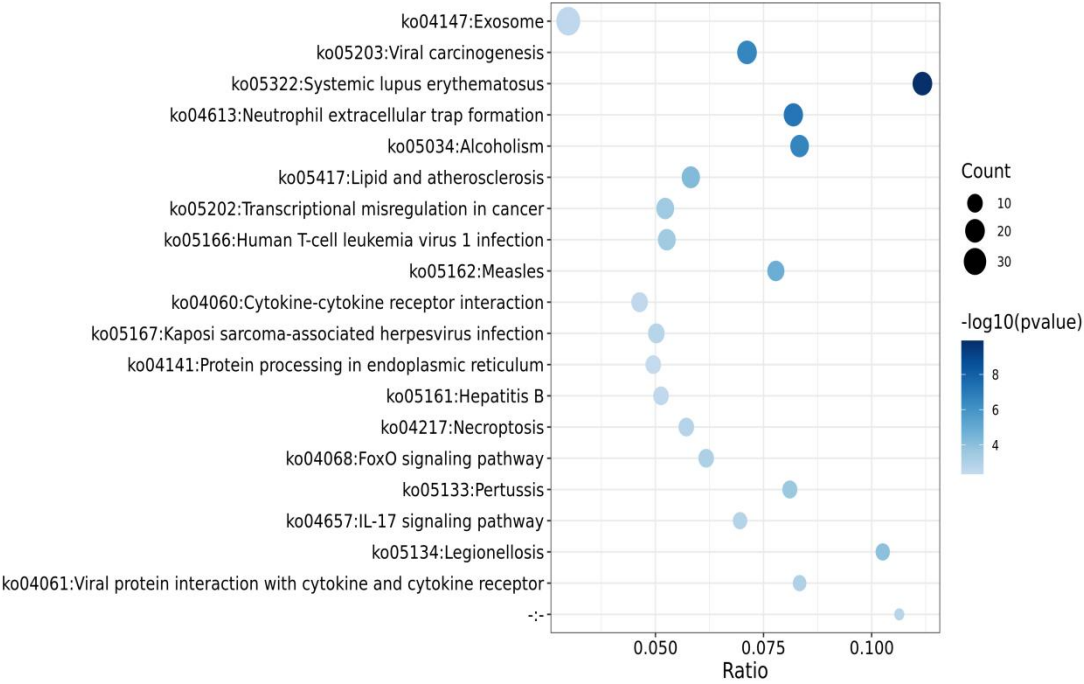

Supplement: Supplementary file 1 [file 9422261dbe5682259491ef78.pdf]
