# Supplementary material for: Orf132: A Critical Gene for LSDV Replication and Its Role in ER Stress-Related Apoptosis
Source: Research Square preprint supplement (doi:10.21203/rs.3.rs-6261646/v1), 2025-03-24
Supplement: Supplementary file 2 [file a38e369a3b796968499eeb69.pdf]

Uncropped Gels of Figure 1A:

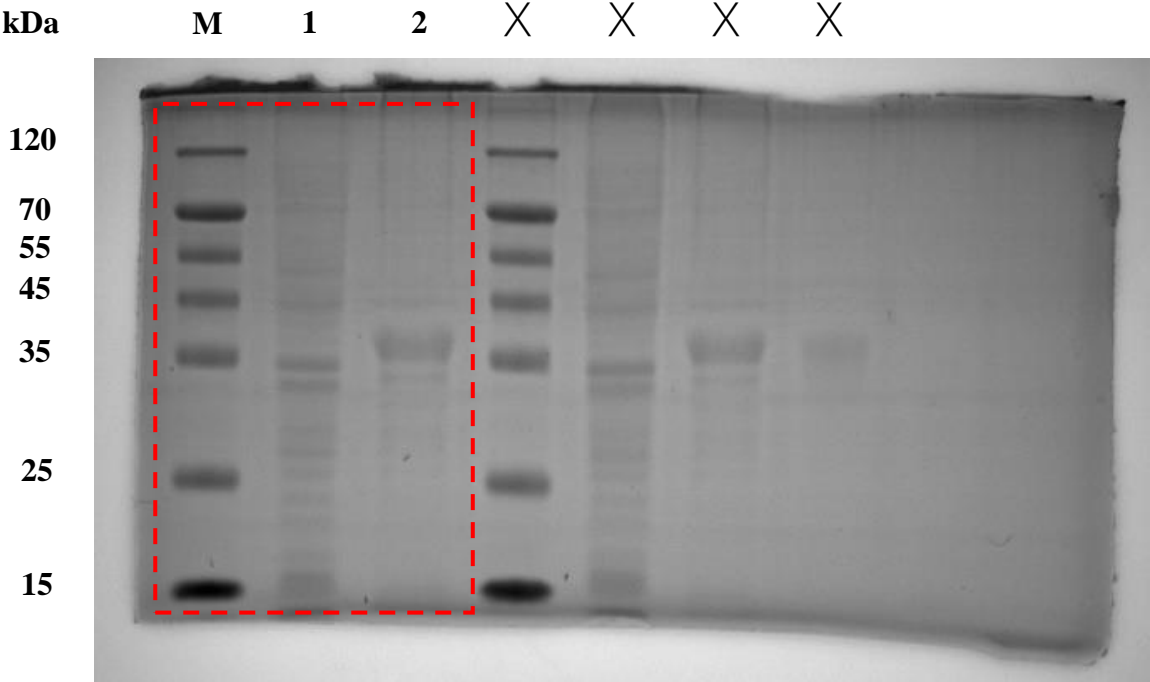

The red dotted line is the portion of the text cropped from the Figure 1A.

# Uncropped Gels of Figure 1B:

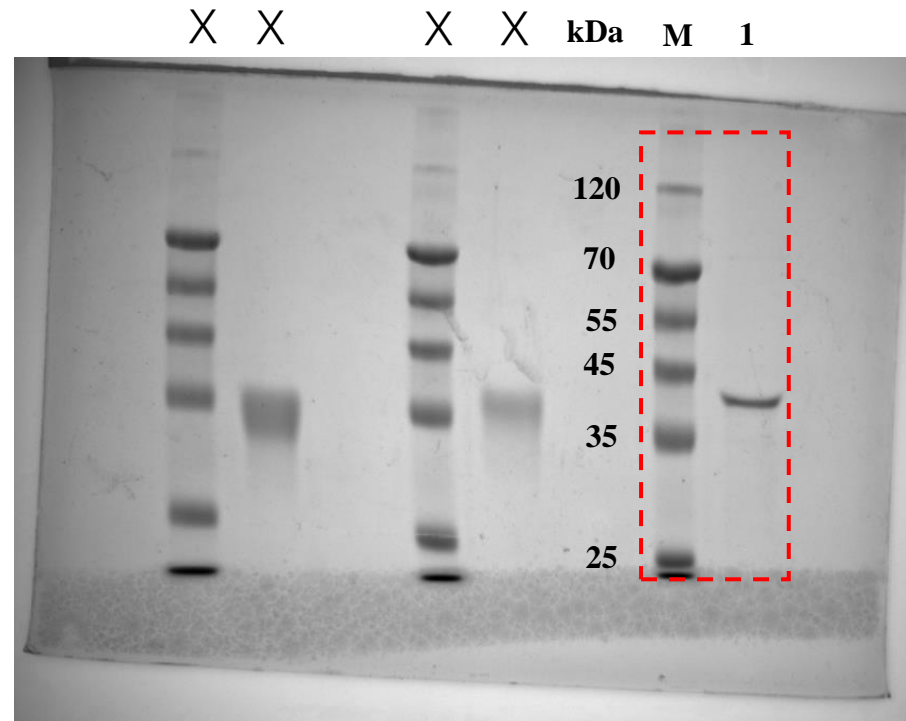

The red dotted line is the portion of the text cropped from the Figure 1B.

Uncropped Blots of Figure 1C:

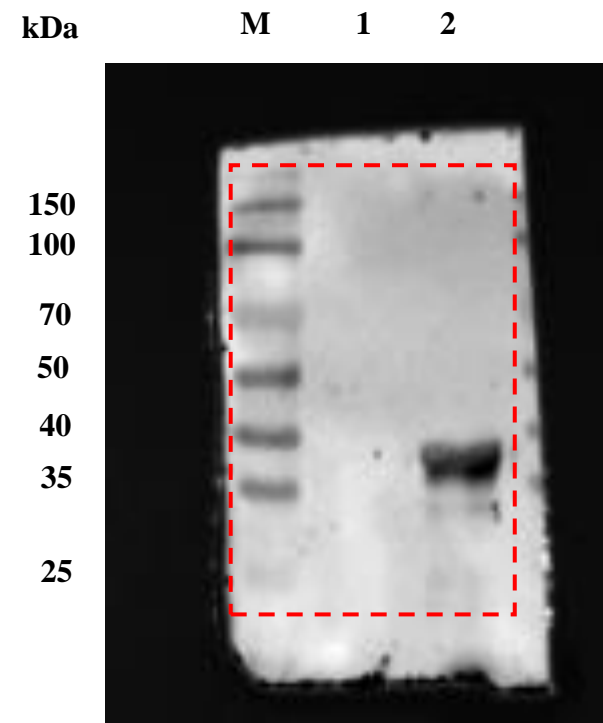

The red dotted line is the portion of the text cropped from the Figure 1C.

# Uncropped Gels of Figure 2C:

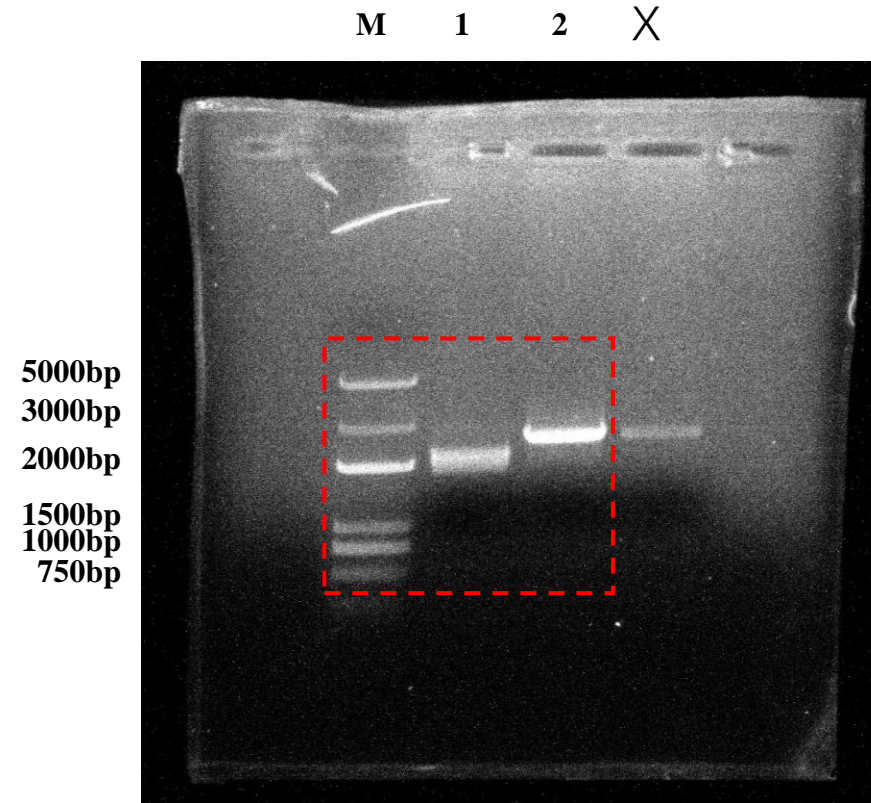

The red dotted line is the portion of the text cropped from the Figure 2C.

Uncropped Blots of Figure 4A:GRP78

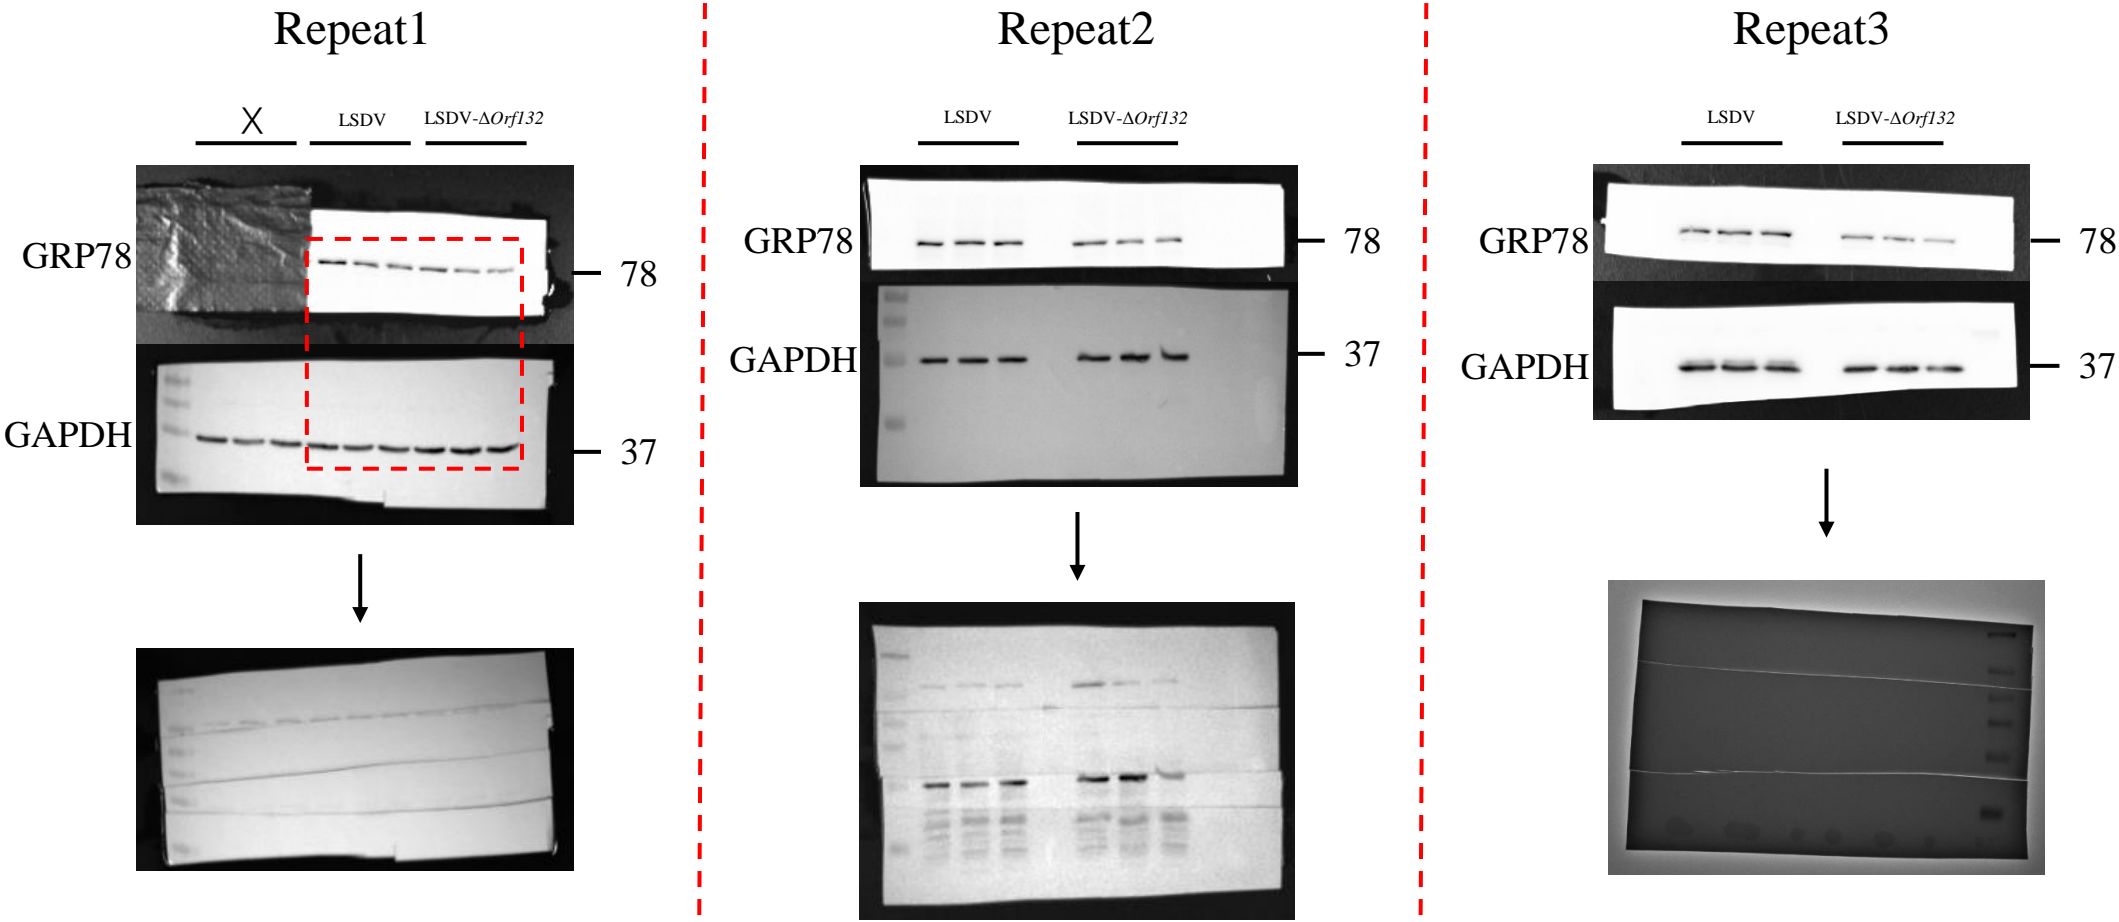

The red dotted line is the portion of the text cropped from the Figure 4A:GRP78. In the ‘Repeat1’ experiment, the first three lanes contained redundant samples. To avoid any potential confusion and to ensure clarity in the presentation of our data, we chose to mask these lanes. This decision does not affect the validity or the conclusions drawn from our experimental results. To further substantiate the authenticity and reliability of our findings, we have included three additional sets of replicates in our study. These replicates were specifically designed to reinforce the robustness of our experimental outcomes and to provide a comprehensive validation of our results.

# Uncropped Blots of Figure 4A:CHOP

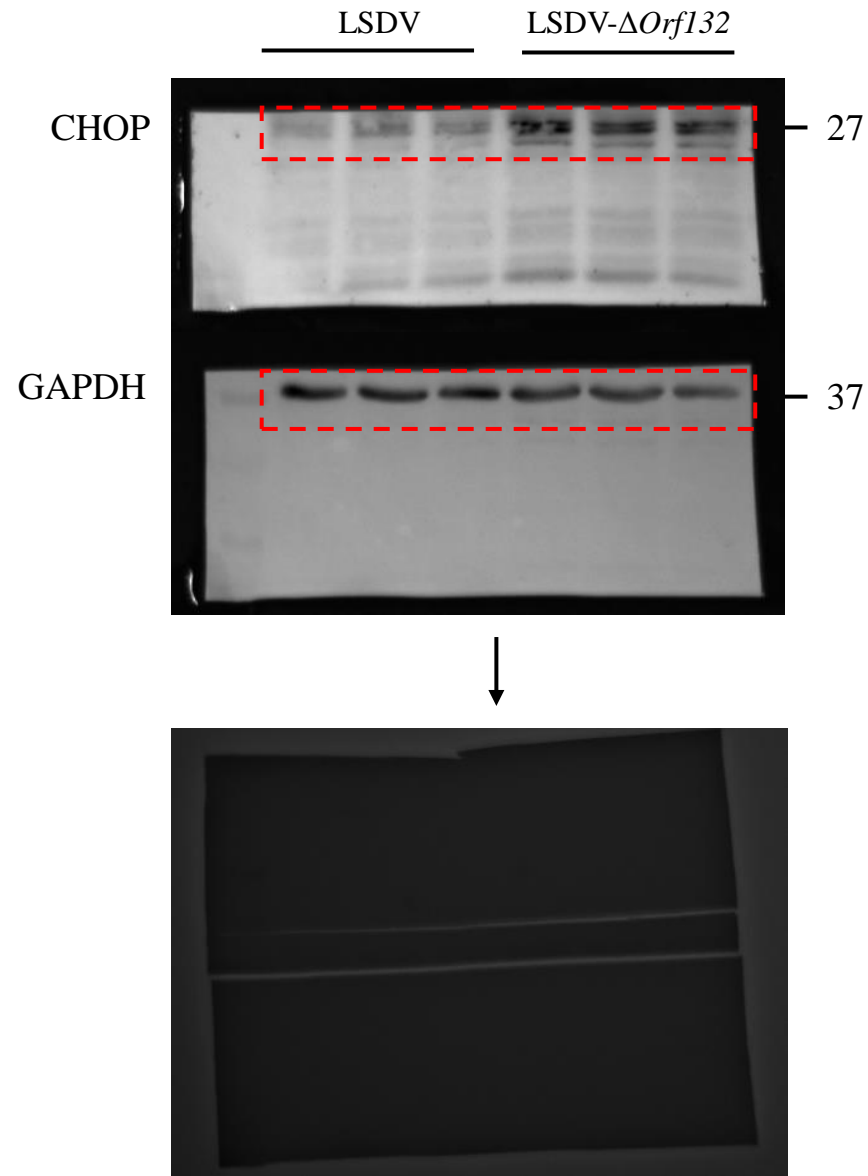

The red dotted line is the portion of the text cropped from the Figure 4A:CHOP.

Uncropped Blots of Figure 4A:Full-Caspase-12/S-Caspase-12

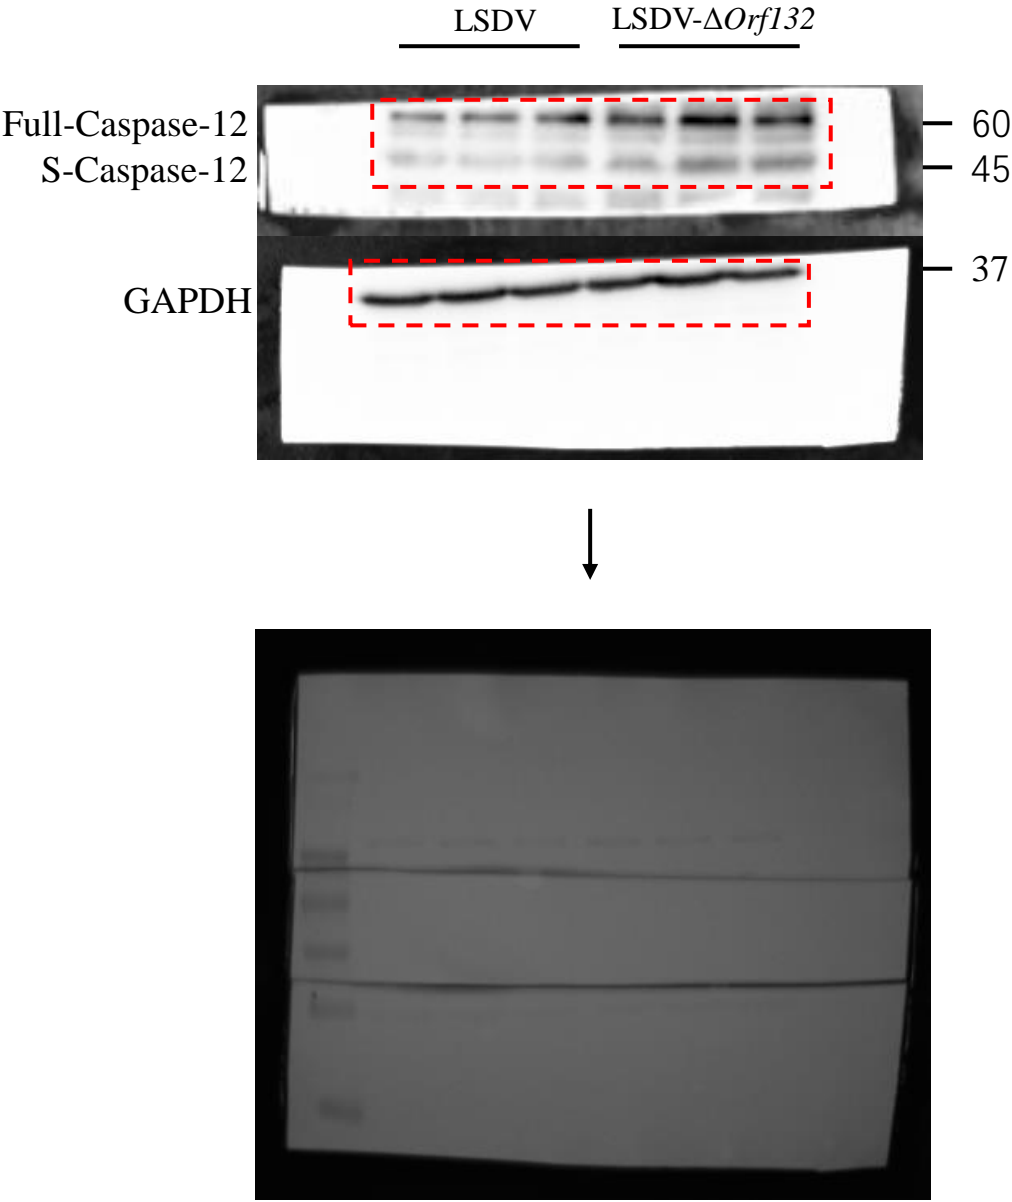

The red dotted line is the portion of the text cropped from the Figure 4A: Full-Caspase-12/S-Caspase-12.
